# Supplementary material for: Cancer Stem Cells in Head and Neck Metastatic Malignant Melanoma Express Components of the Renin-Angiotensin System
Source: PubMed Central journal article supplement (PMC7694034; doi:10.3390/life10110268), 2020-11-02
Supplement: life-10-00268-s001.pdf [file life-10-00268-s001.pdf]

1 **The Supplementary materials of Cancer Stem Cells in**  
2 **Head and Neck Metastatic Malignant Melanoma**  
3 **Express Components of the Renin-angiotensin**  
4 **System**

5 **Table S1.** Demographics and characteristics of the metastasis of the 20 patients with head and  
6 neck metastatic malignant melanoma.

| Patient | Gender | Age<br>(Years) | Metastatic Site |
|---------|--------|----------------|-----------------|
| 1       | M      | 103            | Neck nodes      |
| 2       | M      | 77             | Neck nodes      |
| 3       | F      | 83             | Neck nodes      |
| 4       | F      | 67             | Neck nodes      |
| 5       | M      | 56             | Neck nodes      |
| 6       | M      | 73             | Neck nodes      |
| 7       | M      | 70             | Parotid nodes   |
| 8       | M      | 73             | Neck nodes      |
| 9       | M      | 70             | Neck nodes      |
| 10      | F      | 86             | Neck nodes      |
| 11      | M      | 78             | Parotid nodes   |
| 12      | M      | 66             | Neck nodes      |
| 13      | F      | 79             | Parotid nodes   |
| 14      | M      | 76             | Neck nodes      |
| 15      | M      | 78             | Parotid nodes   |
| 16      | M      | 77             | Neck nodes      |
| 17      | M      | 47             | Neck nodes      |
| 18      | M      | 64             | Neck nodes      |
| 19      | M      | 59             | Neck nodes      |
| 20      | M      | 83             | Parotid nodes   |

7 M, male; F, female

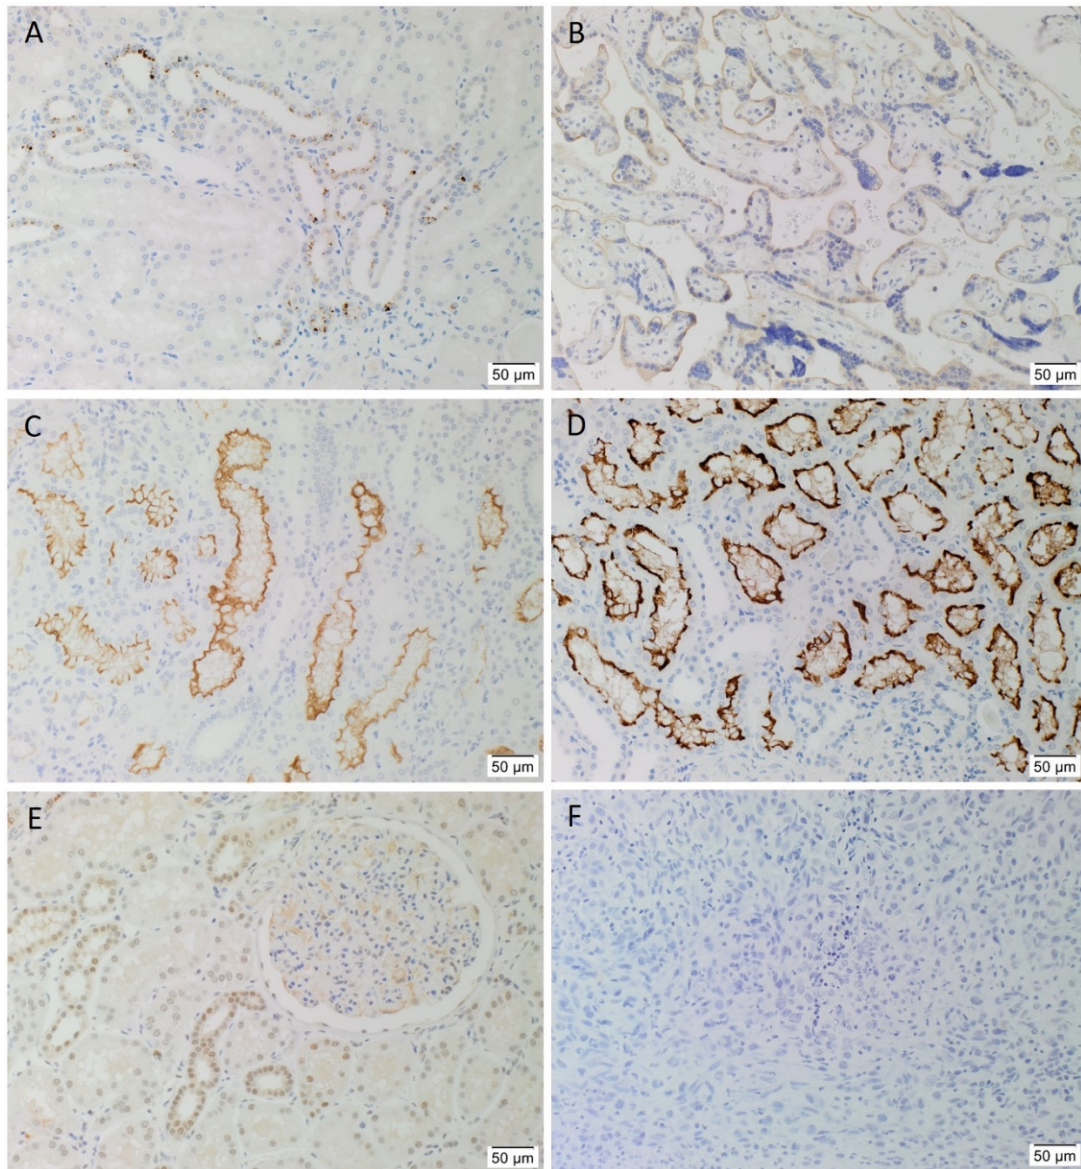

8

9

10

11

12

13

**Figure S1.** Normal human control tissues used as positive controls for immunohistochemical staining on sections of kidney for renin (A, brown), placenta for PRR (B, brown), kidney for ACE (C, brown), ACE2 (D, brown), and AT<sub>2</sub>R (E, brown). The negative control (F) was a head and neck metastatic malignant melanoma section with the primary antibody replaced with an appropriate isotype matched antibody. All slides were counterstained with hematoxylin (A-F, blue). Original magnification 200x.

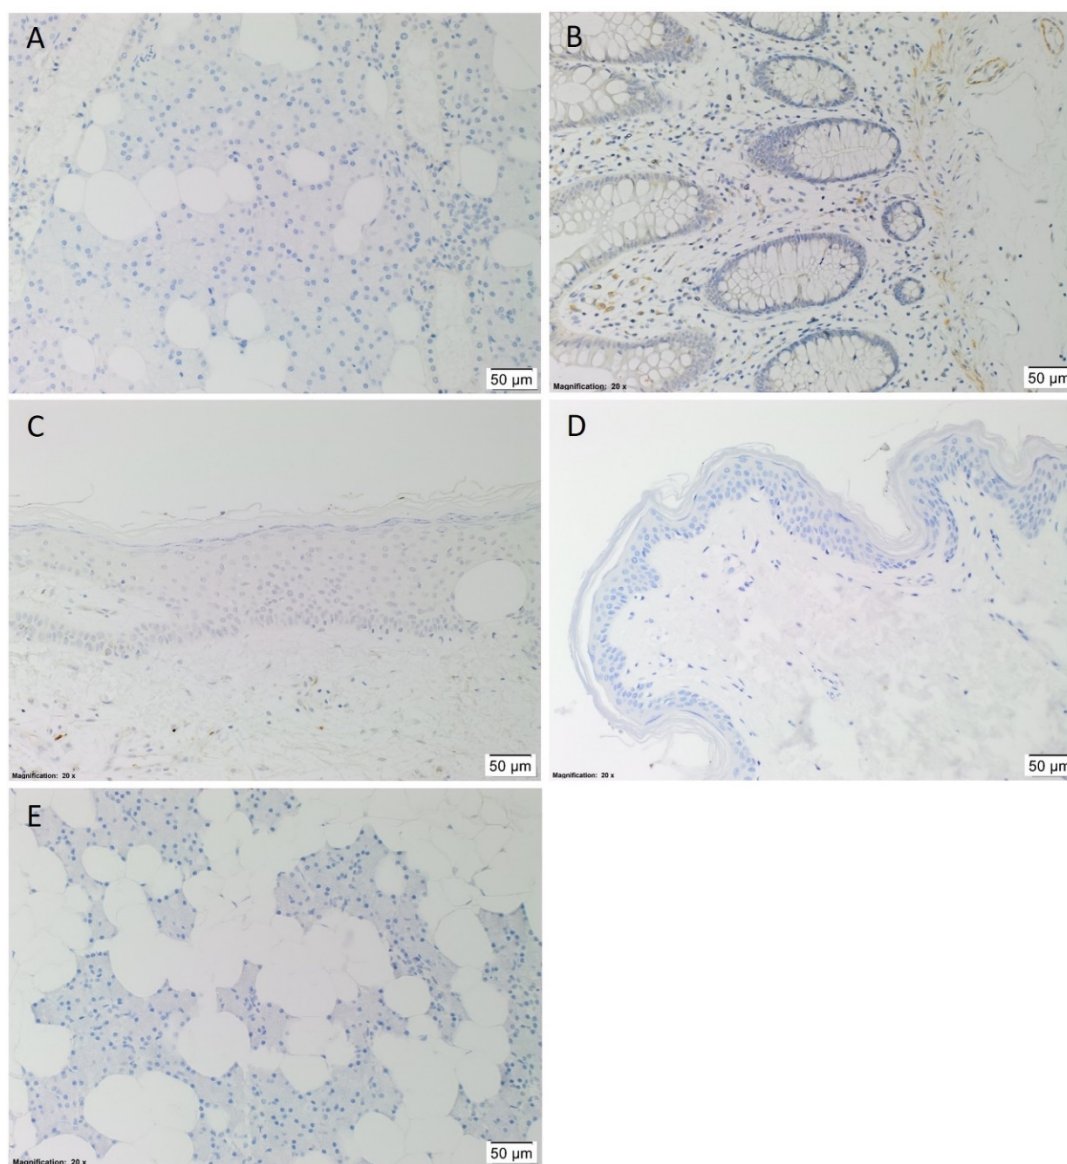

14

15

16

17

**Figure S2.** Normal human tissue immunohistochemical staining negative controls: salivary gland for renin (A), colon for PRR (B), skin for ACE (C), and ACE2 (D), and salivary gland for AT<sub>2</sub>R (E). All slides were counterstained with hematoxylin (A-E, blue). Original magnification 200x.

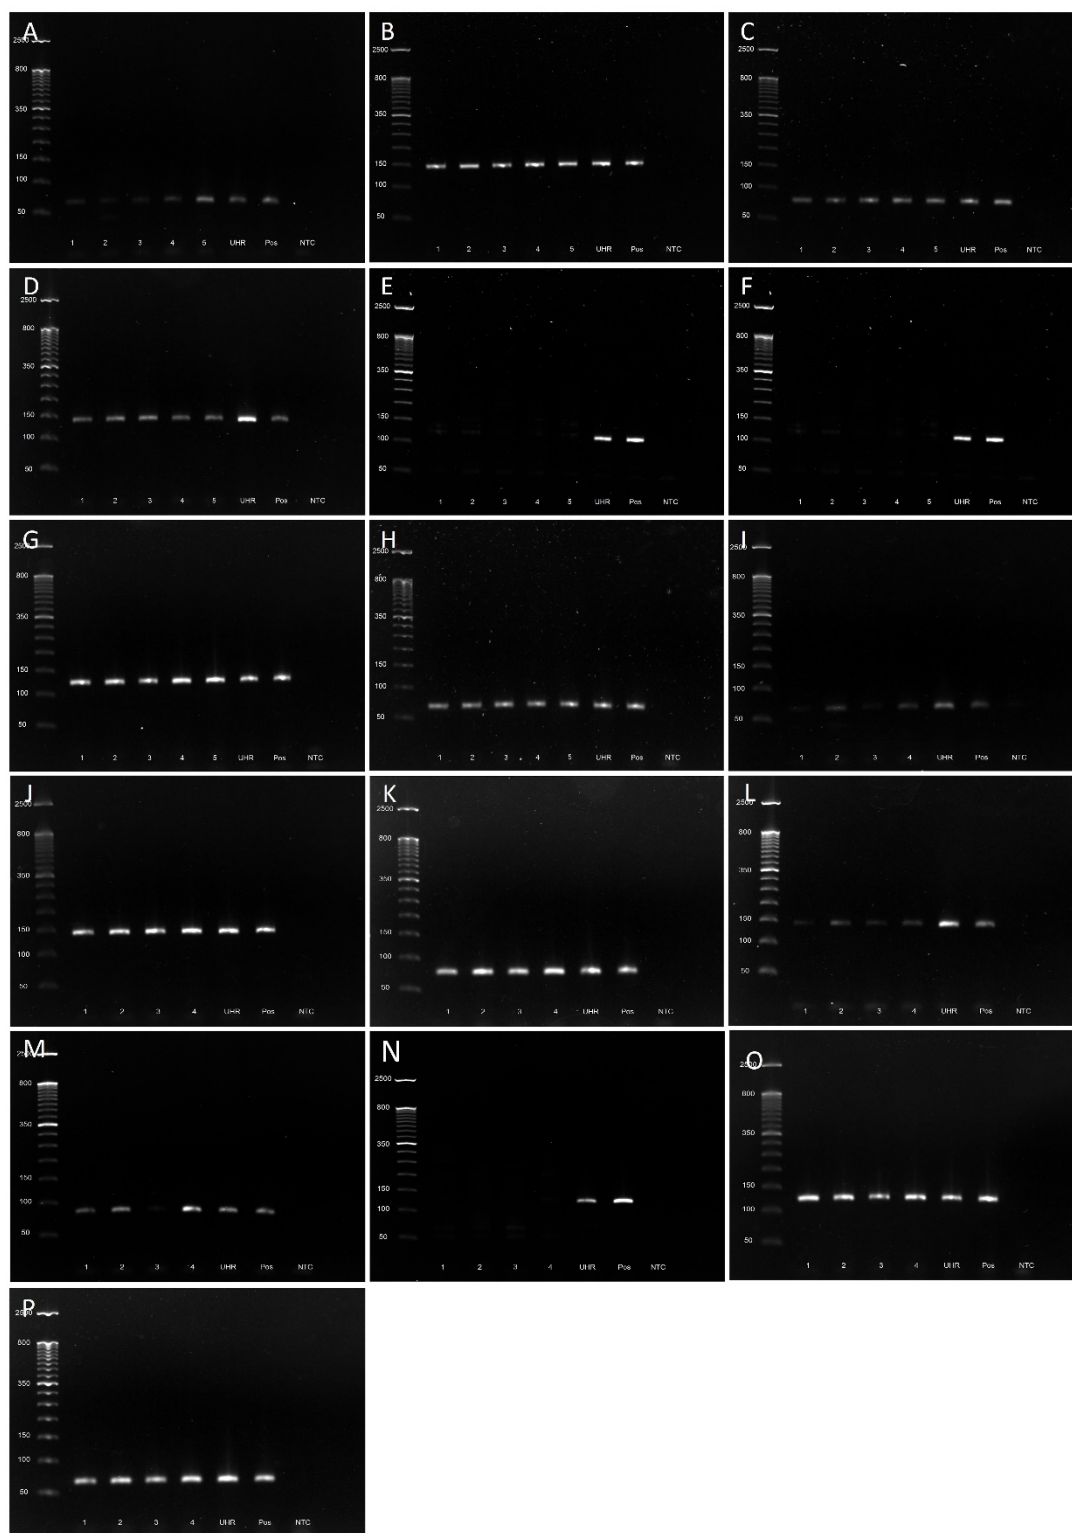

18  
19  
20  
21  
22  
23

**Figure S3.** Reverse transcription quantitative polymerase chain reaction product gels showing a single band in each lane representing the gene of interest for head and neck metastatic malignant melanoma (HNmMM) tissue samples (A-H) and HNmMM-derived cell lines (I-P), demonstrating probe specificity for renin (A,I, 62bp), PRR (B,J, 141bp), ACE, (C,K, 74bp), ACE2 (D,L, 141bp), AT<sub>1</sub>R (E,M, 80), AT<sub>2</sub>R (F,N, 113), GAPDH (G,O, 122bp), and PSMB4 (H,P, 63bp).

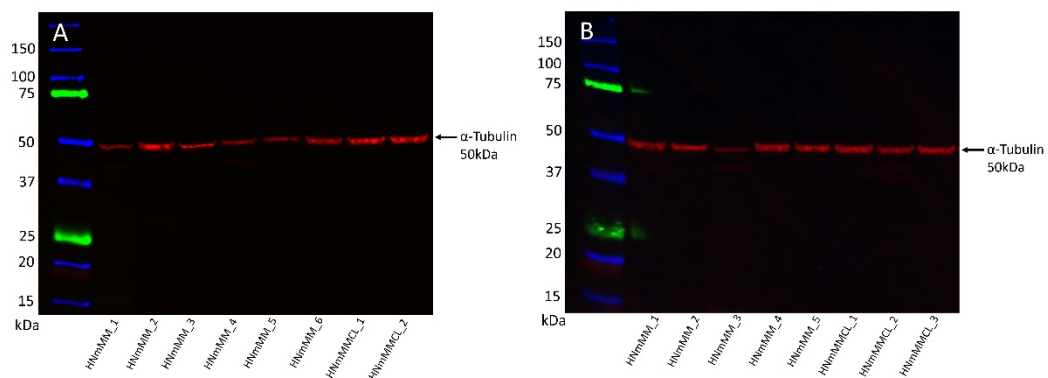

24  
25  
26

**Figure S4.** Representative western blot image of  $\alpha$ -tubulin (~50 kDa), confirming approximately equal loading. Different sample numbers were used between markers due to sample depletion.

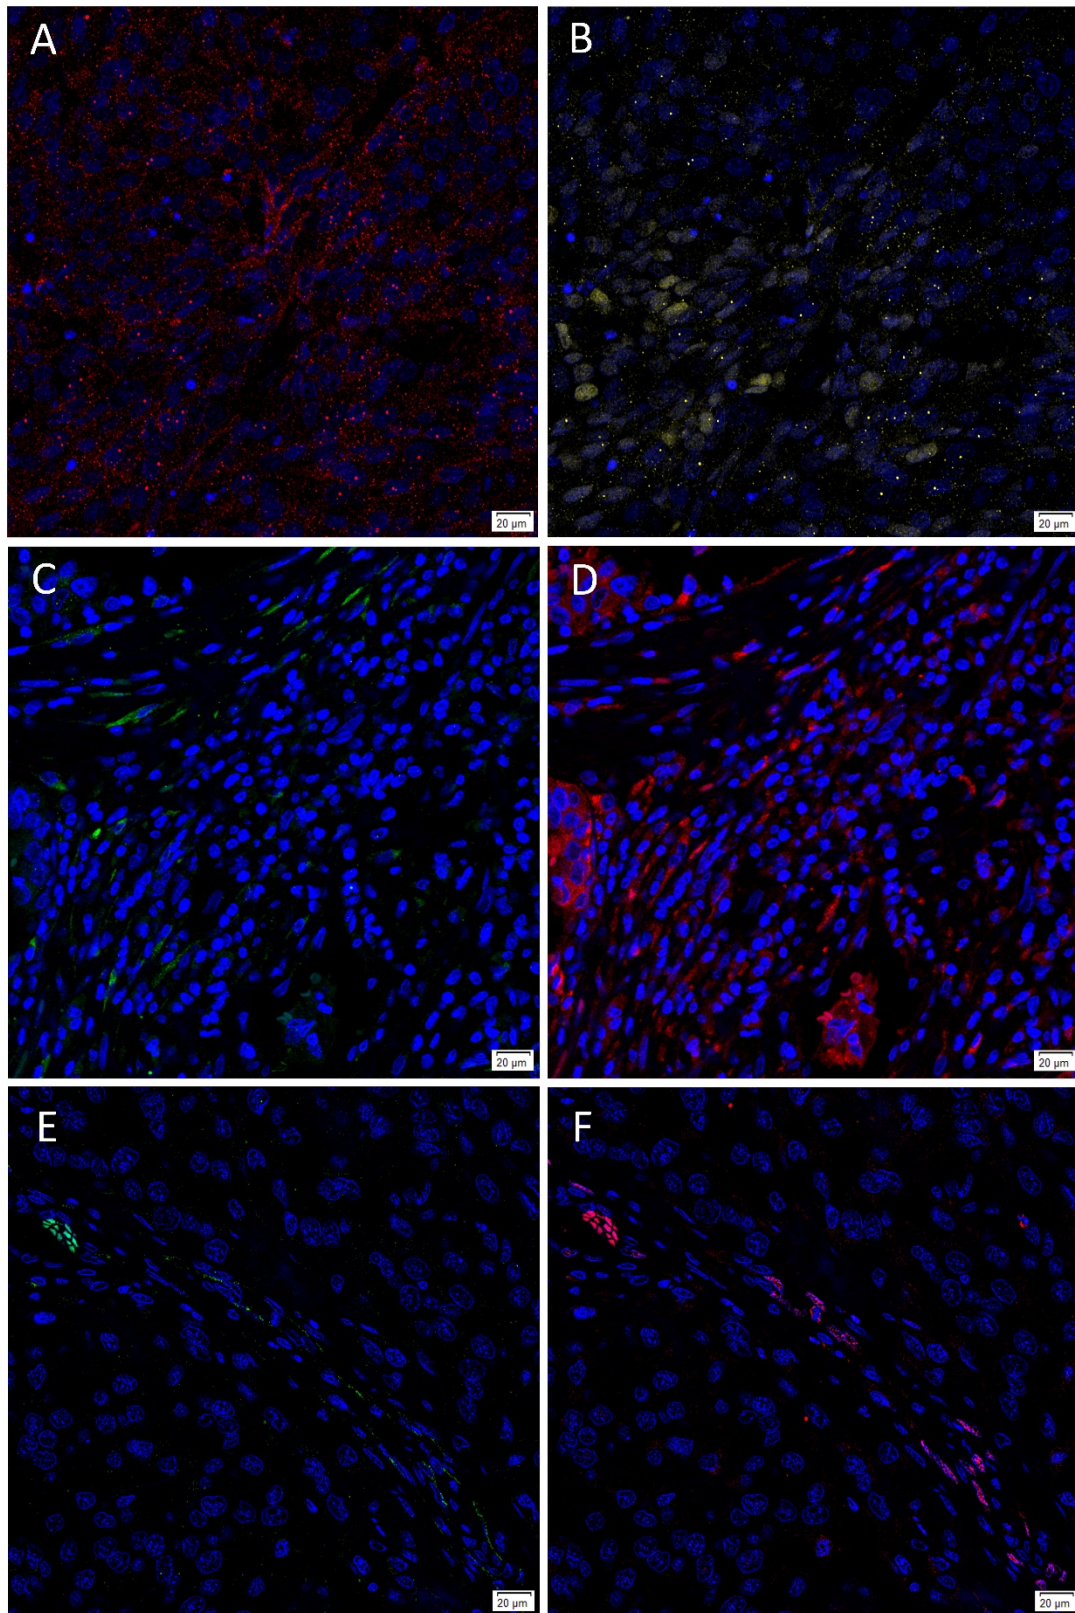

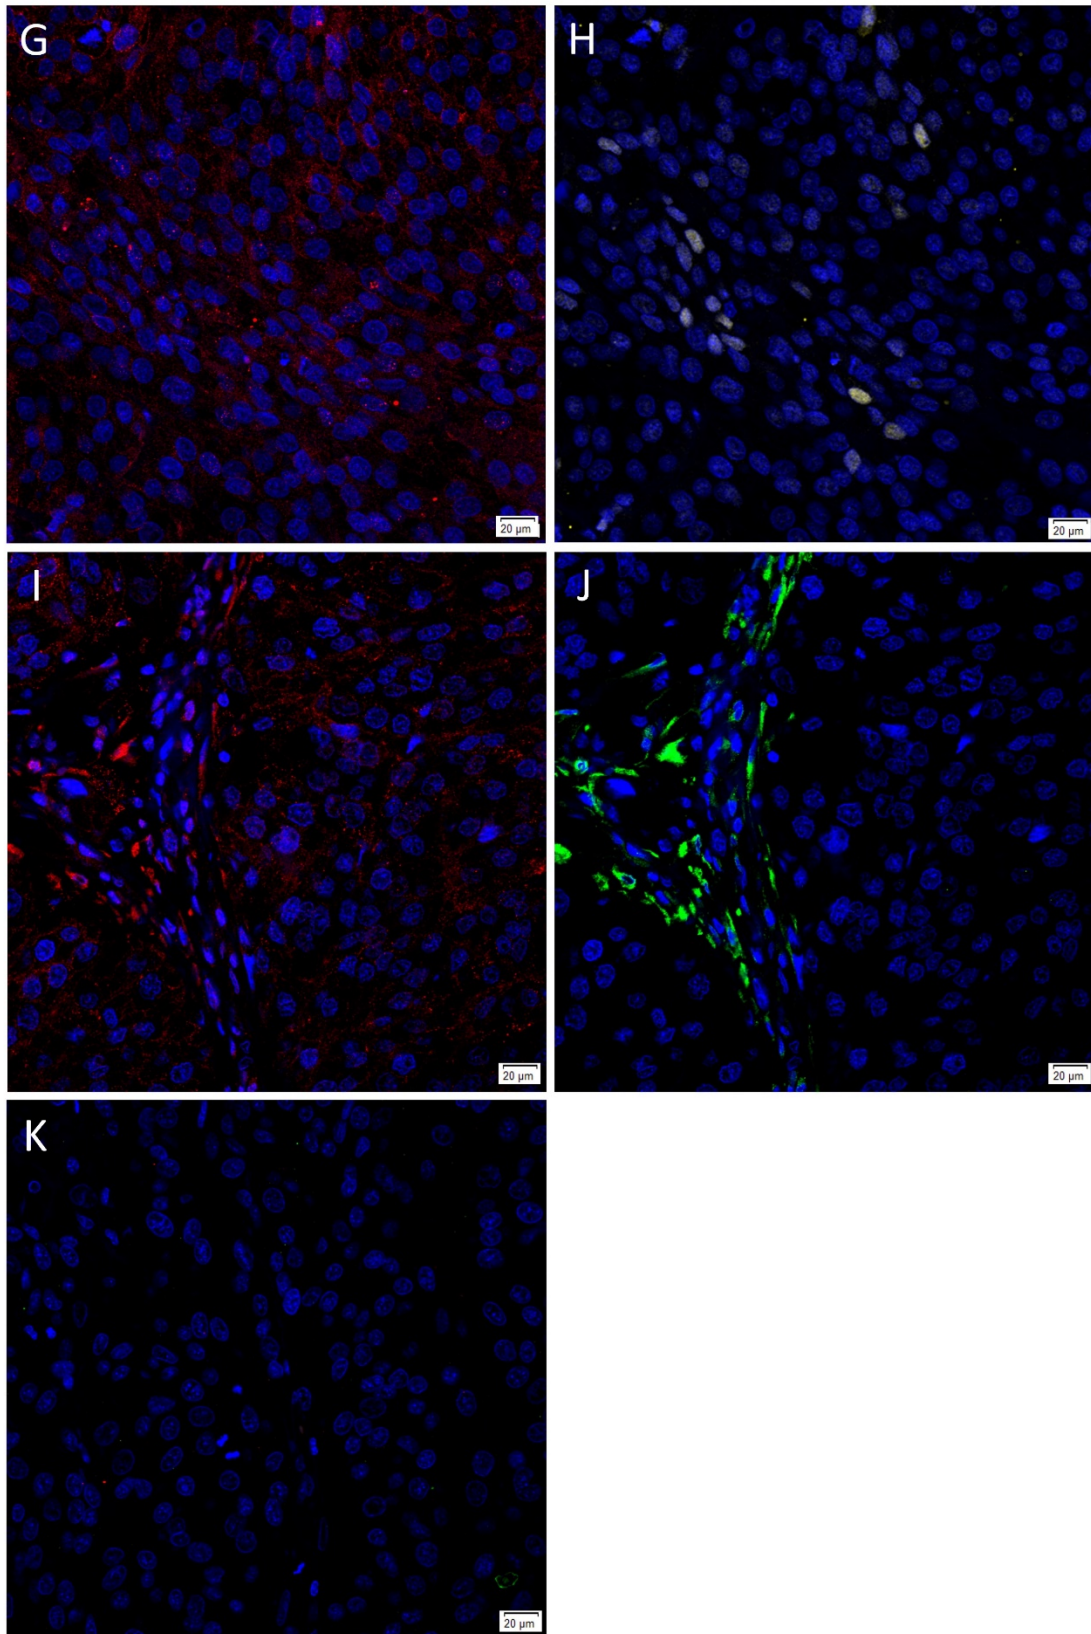

28  
29  
30  
31  
32  
33

**Figure S5.** Split immunofluorescence images of head and neck metastatic malignant melanoma tissue samples showing expression of PRR (A, red) and SOX2 (B, yellow); PRR (C, red) and OCT4 (D, green); ERG (E, red) and ACE (F, green); AT<sub>2</sub>R (G, red) and SOX2 (H, yellow); AT<sub>2</sub>R (I, red) and OCT4 (J, green); and a negative control (K). Cell nuclei were counterstained with 4',6-diamidino-2-phenylindole (A-K, blue). Original magnification: 400x.

34 **Publisher's Note:** MDPI stays neutral with regard to jurisdictional claims in published maps and institutional  
35 affiliations.

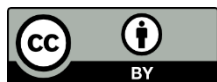

© 2020 by the authors. Submitted for possible open access publication under the terms and conditions of the Creative Commons Attribution (CC BY) license (<http://creativecommons.org/licenses/by/4.0/>).

36
